# Supplementary material for: Gestational Exposure to Cyfluthrin through Endoplasmic Reticulum (ER) Stress—Mediated PERK Signaling Pathway Impairs Placental Development
Source: MDPI journal article supplement (doi:10.3390/toxics10120733), 2022-11-28
Supplement: s1 [file s1]

# Gestational Exposure to Cyfluthrin through Endoplasmic Reticulum (ER) Stress—Mediated PERK Signaling Pathway Impairs Placental Development

Wensi Ni <sup>1,2</sup>, Haoxuan Gao <sup>1,2</sup>, Bing Wu <sup>1,2</sup>, Ji Zhao <sup>1,2</sup>, Jian Sun <sup>1,2</sup>, Yanan Song <sup>1,2</sup>, Yiping Sun <sup>1,2</sup>  
and Huifang Yang <sup>1,2,\*</sup>

**Table S1.** Primer sequences of genes.

| genes         |         | Primer sequence           |
|---------------|---------|---------------------------|
| GRP78         | Forward | CCAACGAGTAGCGAGTTCACCAATC |
|               | Reverse | GCCAAGTGTCCAAGTCAGTGTAGTC |
| PERK(Eif2ak3) | Forward | TGGGATGTCGCCGATGGGATAG    |
|               | Reverse | AATTCCACTTCTCACTGCCGCTTC  |
| eIF2α         | Forward | GCGAATTGTGGCAGGTTTCTTGG   |
|               | Reverse | TAGGCTCCTCACTAGGCACTTCAC  |
| ATF4          | Forward | CTGCTTGCTCTGTGGTAGATGTCTC |
|               | Reverse | CTCTGCTGCCTCTAATACGCCATG  |
| CHOP          | Forward | TGGCATCACCTCCTGTCTGTCTC   |
|               | Reverse | CCCTCTCCTTTGGTCTACCCTCAG  |
| VEGFα         | Forward | GCACTGGACCCTGGCTTTACTG    |
|               | Reverse | ATCGGGGTACTCCTGGAAGATGTC  |
